# Supplementary material for: The antifungal activity of vapour phase of odourless thymol derivate
Source: PeerJ. 2020 Aug 19;8:e9601. doi: 10.7717/peerj.9601 (PMC7443090; doi:10.7717/peerj.9601)
Supplement: Data S1 [file peerj-08-9601-s002.xlsx]

## Sheet: fig 1 water
water														TIC: org248.D\data.ms						TIC: org017.D\data.ms						TIC: org140.D\data.ms
	1		2		3		av		STD		RSD			Kubicin voda 0h						Kubicin voda 0h						Kubicin voda 0h
Time/h	thymol	kubicin	thymol	kubicin	thymol	kubicin	thymol	kubicin	thymol	kubicin	thymol	kubicin
0	0.167554	99.9502	0.155984	99.844	0.174189	99.8258	0.165909	99.8733	0.00921335	0.0671921	5.55326	0.0672773		Peak #	Ret Time	Area				Peak #	Ret Time	Area				Peak #	Ret Time	Area
1	6.68584	93.3142	6.04476	93.9552	6.89859	93.1014	6.54306	93.4569	0.444463	0.444463	6.79289	0.47558		1	7.782	791	0.167554			1	7.687	682	0.155984			1	7.69	848	0.174189
2	15.8682	84.1318	14.6907	77.8363	15.0081	79.5188	15.189	80.4956	0.609232	3.25948	4.01101	4.04926		2	7.96	471852	99.9502			2	7.865	436543	99.844			2	7.868	485980	99.8258
3	34.9939	65.0061	35.6065	64.3935	34.2631	65.7369	34.9545	65.0455	0.672563	0.672563	1.92411	1.03399				472643						437225						486828
4	40.6622	59.3378	39.9891	60.0109	41.338	58.662	40.6631	59.3369	0.674465	0.674465	1.65867	1.13667
5	47.8191	52.1809	48.3531	51.6469	47.3196	52.6804	47.8306	52.1694	0.516802	0.516802	1.08048	0.990622		TIC: org254.D\data.ms						TIC: org023.D\data.ms						TIC: org146.D\data.ms
6	62.8254	37.1746	63.6732	36.3268	61.0967	38.9033	62.5318	37.4682	1.31307	1.31307	2.09985	3.50449		Kubicin voda 1h						Kubicin voda 1h						Kubicin voda 1h
8	66.1087	33.8913	65.34	34.66	66.8573	33.1427	66.102	33.898	0.758716	0.758716	1.1478	2.23823
10.4	80.099	19.901	79.7324	20.2676	81.0487	18.9513	80.2934	19.7066	0.679351	0.679351	0.846086	3.44733		Peak #	Ret Time	Area				Peak #	Ret Time	Area				Peak #	Ret Time	Area
12	87.8015	12.1985	88.142	11.858	86.7575	13.2425	87.567	12.433	0.721451	0.721451	0.823884	5.80271		1	7.784	31563	6.68584			1	7.689	26221	6.04476			1	7.692	30852	6.89859
16	93.4619	6.53806	92.9923	7.00773	93.9312	6.06881	93.4618	6.5382	0.469459	0.469459	0.5023	7.18024		2	7.962	440524	93.3142			2	7.867	407560	93.9552			2	7.87	416370	93.1014
24	95.3376	4.6624	95.8262	4.17376	95.5776	4.42244	95.5805	4.41953	0.24433	0.24433	0.255627	5.52841				472087						433781						447222
48	99.5489	0.451107	99.5268	0.473217	99.5385	0.461473	99.5381	0.461932	0.0110621	0.0110621	0.0111135	2.39475
														TIC: org260.D\data.ms						TIC: org029.D\data.ms						TIC: org152.D\data.ms
														Kub VODA 2h						Kub VODA 2h						Kub VODA 2h
														Peak #	Ret Time	Area				Peak #	Ret Time	Area				Peak #	Ret Time	Area
														1	7.783	78890	15.8682			1	7.688	73036	14.6907			1	7.691	74614	15.0081
														2	7.962	418269	84.1318			2	7.867	386970	77.8363			2	7.87	395335	79.5188
																497159						497159						497159
														TIC: org266.D\data.ms						TIC: org035.D\data.ms						TIC: org158.D\data.ms
														Kub VODA 3h						Kub VODA 3h						Kub VODA 3h
														Peak #	Ret Time	Area				Peak #	Ret Time	Area				Peak #	Ret Time	Area
														1	7.783	163112	34.9939			1	7.688	155009	35.6065			1	7.691	149271	34.2631
														2	7.963	303004	65.0061			2	7.868	280330	64.3935			2	7.871	286390	65.7369
																466116						435339						435661
														TIC: org272.D\data.ms						TIC: org041.D\data.ms						TIC: org164.D\data.ms
														Kub VODA 4h						Kub VODA 4h						Kub VODA 4h
														Peak #	Ret Time	Area				Peak #	Ret Time	Area				Peak #	Ret Time	Area
														1	7.783	191192	40.6622			1	7.688	172006	39.9891			1	7.691	185829	41.338
														2	7.963	279004	59.3378			2	7.868	258126	60.0109			2	7.871	263706	58.662
																470196						430132						449535
														TIC: org278.D\data.ms						TIC: org047.D\data.ms						TIC: org170.D\data.ms
														Kub VODA 5h						Kub VODA 5h						Kub VODA 5h
														Peak #	Ret Time	Area				Peak #	Ret Time	Area				Peak #	Ret Time	Area
														1	7.784	206502	47.8191			1	7.689	195180	48.3531			1	7.692	191310	47.3196
														2	7.963	225338	52.1809			2	7.868	208476	51.6469			2	7.871	212983	52.6804
																431840						403656						404293
														TIC: org284.D\data.ms						TIC: org053.D\data.ms						TIC: org176.D\data.ms
														Kub VODA 6h						Kub VODA 6h						Kub VODA 6h
														Peak #	Ret Time	Area				Peak #	Ret Time	Area				Peak #	Ret Time	Area
														1	7.783	296400	62.8254			1	7.688	284407	63.6732			1	7.691	260335	61.0967
														2	7.962	175384	37.1746			2	7.867	162260	36.3268			2	7.87	165768	38.9033
																471784						446667						426103
														TIC: org290.D\data.ms						TIC: org059.D\data.ms						TIC: org182.D\data.ms
														Kub VODA 8h						Kub VODA 8h						Kub VODA 8h
														Peak #	Ret Time	Area				Peak #	Ret Time	Area				Peak #	Ret Time	Area
														1	7.783	315780	66.1087			1	7.688	282349	65.34			1	7.691	308665	66.8573
														2	7.962	161888	33.8913			2	7.867	149774	34.66			2	7.87	153012	33.1427
																477668						432123						461677
														TIC: org296.D\data.ms						TIC: org065.D\data.ms						TIC: org188.D\data.ms
														Kub VODA 10.4h						Kub VODA 10.4h						Kub VODA 10.4h
														Peak #	Ret Time	Area				Peak #	Ret Time	Area				Peak #	Ret Time	Area
														1	7.783	365540	80.099			1	7.688	338417	79.7324			1	7.691	345728	81.0487
														2	7.962	90820	19.901			2	7.867	86024	20.2676			2	7.87	80840	18.9513
																456360						424441						426568
														TIC: org302.D\data.ms						TIC: org071.D\data.ms						TIC: org194.D\data.ms
														Kub VODA 12h						Kub VODA 12h						Kub VODA 12h
														Peak #	Ret Time	Area				Peak #	Ret Time	Area				Peak #	Ret Time	Area
														1	7.784	401244	87.8015			1	7.689	371472	88.142			1	7.692	384497	86.7575
														2	7.962	55746	12.1985			2	7.867	49975	11.858			2	7.87	58689	13.2425
																456990						421447						443186
														TIC: org308.D\data.ms						TIC: org077.D\data.ms						TIC: org200.D\data.ms
														Kub VODA 16H						Kub VODA 16H						Kub VODA 16H
														Peak #	Ret Time	Area				Peak #	Ret Time	Area				Peak #	Ret Time	Area
														1	7.783	445062	93.4619			1	7.688	422038	92.9923			1	7.691	470940	93.9312
														2	7.961	31134	6.53806			2	7.866	31804	7.00773			2	7.869	30427	6.06881
																476196						453842						501367
														TIC: org314.D\data.ms						TIC: org083.D\data.ms						TIC: org206.D\data.ms
														Kub VODA 24h						Kub VODA 24h						Kub VODA 24h
														Peak #	Ret Time	Area				Peak #	Ret Time	Area				Peak #	Ret Time	Area
														1	7.783	406510	95.3376			1	7.688	376347	95.8262			1	7.691	384477	95.5776
														2	7.961	19880	4.6624			2	7.866	16392	4.17376			2	7.869	17790	4.42244
																426390						392739						402267
														TIC: org320.D\data.ms						TIC: or089.D\data.ms						TIC: or212.D\data.ms
														Kub VODA 48h						Kub VODA 48h						Kub VODA 48h
														Peak #	Ret Time	Area				Peak #	Ret Time	Area				Peak #	Ret Time	Area
														1	7.783	454374	99.5489			1	7.688	400659	99.5268			1	7.691	419747	99.5385
														2	7.96	2059	0.451107			2	7.865	1905	0.473217			2	7.868	1946	0.461473
																456433						402564						421693

## Sheet: S3
DMSO														TIC: org249.D\data.ms					TIC: org018.D\data.ms					TIC: org141.D\data.ms
	1		2		3		av		STD		RSD			Kub DMSO 0h					Kub DMSO 0h					Kub DMSO 0h
Time/h	thymol	kubicin	thymol	kubicin	thymol	kubicin	thymol	kubicin	thymol	kubicin	thymol	kubicin
0	0.151983	99.848	0.147982	99.852	0.157078	99.8429	0.152348	99.8477	0.00455885	0.00455885	2.9924	0.00456581		Peak #	Ret Time	Area			Peak #	Ret Time	Area			Peak #	Ret Time	Area
1	29.3703	70.6297	28.4204	71.5796	30.3	69.7	29.3636	70.6364	0.939832	0.939832	3.20067	1.33052		1	7.809	321493	0.151983		1	7.714	289638	0.147982		1	7.717	314068	0.157078
2	41.1308	58.8692	40.7809	59.2191	41.4977	58.5023	41.1364	58.8636	0.358432	0.358432	0.871324	0.608919		2	7.971	211210717	99.848		2	7.876	195435389	99.852		2	7.879	199630033	99.8429
3	49.0072	50.9928	49.3231	50.6769	48.4207	51.5793	48.917	51.083	0.457881	0.457881	0.936038	0.896348				211532210					195725027					199944101
4	54.6046	45.3954	53.8063	46.1937	55.5761	44.4239	54.6623	45.3377	0.886296	0.886296	1.6214	1.95488
5	61.0409	38.9591	59.0623	40.9377	62.3129	37.6871	60.8054	39.1946	1.63807	1.63807	2.69396	4.17932		TIC: org255.D\data.ms					TIC: org024.D\data.ms					TIC: org147.D\data.ms
6	68.7461	31.2539	69.257	30.743	68.2505	31.7495	68.7512	31.2488	0.503301	0.503301	0.732062	1.61063		Kub DMSO 1h					Kub DMSO 1h					Kub DMSO 1h
8	75.1008	24.8992	76.2293	23.7707	74.7645	25.2355	75.3649	24.6351	0.767235	0.767235	1.01803	3.11439
10	83.379	16.621	83.6431	16.3569	82.9996	17.0004	83.3406	16.6594	0.323455	0.323455	0.388112	1.94157		Peak #	Ret Time	Area			Peak #	Ret Time	Area			Peak #	Ret Time	Area
12	93.159	6.84102	93.2325	6.76753	93.0576	6.94238	93.1497	6.85031	0.0877949	0.0877949	0.0942514	1.28162		1	7.809	47283952	29.3703		1	7.714	41775483	28.4204		1	7.717	46721162	30.3
16	96.9462	3.05376	97.1559	2.84407	97.0426	2.95738	97.0483	2.95174	0.104958	0.104958	0.108151	3.55582		2	7.971	1.13708e+08	70.6297		2	7.876	105215593	71.5796		2	7.879	107473843	69.7
24	99.0292	0.970795	99.0753	0.924667	98.9907	1.00931	99.0317	0.968256	0.0423773	0.0423773	0.0427916	4.37666				1.60992e+08					146991076					154195005
48	99.9776	0.0224261	99.9815	0.0185476	99.9772	0.0227808	99.9787	0.0212515	0.00234835	0.00234835	0.00234885	11.0503
														TIC: org261.D\data.ms					TIC: org030.D\data.ms					TIC: org153.D\data.ms
														Kub DMSO 2h					Kub DMSO 2h					Kub DMSO 2h
														Peak #	Ret Time	Area			Peak #	Ret Time	Area			Peak #	Ret Time	Area
														1	7.832	72558388	41.1308		1	7.737	66174556	40.7809		1	7.74	69625723	41.4977
														2	7.976	103850611	58.8692		2	7.881	96094009	59.2191		2	7.884	98156482	58.5023
																176408999					162268565					167782205
														TIC: org267.D\data.ms					TIC: org036.D\data.ms					TIC: org160.D\data.ms
														Kub DMSO 3h					Kub DMSO 3h					Kub DMSO 3h
														Peak #	Ret Time	Area			Peak #	Ret Time	Area			Peak #	Ret Time	Area
														1	7.832	88658388	49.0072		1	7.737	83079936	49.3231		1	7.74	81853103	48.4207
														2	7.976	92250611	50.9928		2	7.881	85360413	50.6769		2	7.884	87192510	51.5793
																180908999					168440349					169045613
														TIC: org273.D\data.ms					TIC: org042.D\data.ms					TIC: org166.D\data.ms
														Kub DMSO 4h					Kub DMSO 4h					Kub DMSO 4h
														Peak #	Ret Time	Area			Peak #	Ret Time	Area			Peak #	Ret Time	Area
														1	7.845	134334198	54.6046		1	7.75	120366601	53.8063		1	7.753	132053284	55.5761
														2	7.979	111678254	45.3954		2	7.884	103337005	46.1937		2	7.887	105554935	44.4239
																246012452					223703606					237608219
														TIC: org279.D\data.ms					TIC: org048.D\data.ms					TIC: org172.D\data.ms
														Kub DMSO 5h					Kub DMSO 5h					Kub DMSO 5h
														Peak #	Ret Time	Area			Peak #	Ret Time	Area			Peak #	Ret Time	Area
														1	7.857	135578622	61.0409		1	7.762	115518688	59.0623		1	7.765	135230261	62.3129
														2	7.98	86532319	38.9591		2	7.885	80069220	40.9377		2	7.888	81787752	37.6871
																222110941					195587908					217018013
														TIC: org285.D\data.ms					TIC: org054.D\data.ms					TIC: org178.D\data.ms
														Kub DMSO 6h					Kub DMSO 6h					Kub DMSO 6h
														Peak #	Ret Time	Area			Peak #	Ret Time	Area			Peak #	Ret Time	Area
														1	7.862	160731175	68.7461		1	7.767	138804922	69.257		1	7.77	142019545	68.2505
														2	7.978	73072867	31.2539		2	7.883	61615055	30.743		2	7.886	66066282	31.7495
																233804042					200419977					208085827
														TIC: org291.D\data.ms					TIC: org060.D\data.ms					TIC: org184.D\data.ms
														Kub DMSO 8h					Kub DMSO 8h					Kub DMSO 8h
														Peak #	Ret Time	Area			Peak #	Ret Time	Area			Peak #	Ret Time	Area
														1	7.848	172412493	75.1008		1	7.753	169619486	76.2293		1	7.756	160067736	74.7645
														2	7.971	57162258	24.8992		2	7.876	52892809	23.7707		2	7.879	54028051	25.2355
																229574751					222512295					214095787
														TIC: org297.D\data.ms					TIC: org066.D\data.ms					TIC: org190.D\data.ms
														Kub DMSO 10h					Kub DMSO 10h					Kub DMSO 10h
														Peak #	Ret Time	Area			Peak #	Ret Time	Area			Peak #	Ret Time	Area
														1	7.862	172177444	83.379		1	7.767	162401878	83.6431		1	7.77	159845427	82.9996
														2	7.971	34322280	16.621		2	7.876	31758749	16.3569		2	7.879	32740389	17.0004
																206499724					194160627					192585816
														TIC: org303.D\data.ms					TIC: org072.D\data.ms					TIC: org196.D\data.ms
														Kub DMSO 12h					Kub DMSO 12h					Kub DMSO 12h
														Peak #	Ret Time	Area			Peak #	Ret Time	Area			Peak #	Ret Time	Area
														1	7.854	194257115	93.159		1	7.759	181843237	93.2325		1	7.762	180728379	93.0576
														2	7.966	14265042	6.84102		2	7.871	13199586	6.76753		2	7.874	13482890	6.94238
																208522157					195042823					194211269
														TIC: org309.D\data.ms					TIC: org078.D\data.ms					TIC: org202.D\data.ms
														Kub DMSO 16H					Kub DMSO 16H					Kub DMSO 16H
														Peak #	Ret Time	Area			Peak #	Ret Time	Area			Peak #	Ret Time	Area
														1	7.862	183629714	96.9462		1	7.767	176004389	97.1559		1	7.77	182676984	97.0426
														2	7.971	5784248	3.05376		2	7.876	5152223	2.84407		2	7.879	5567098	2.95738
																189413962					181156612					188244082
														TIC: org315.D\data.ms					TIC: org084.D\data.ms					TIC: org208.D\data.ms
														Kub DMSO 24 h					Kub DMSO 24 h					Kub DMSO 24 h
														Peak #	Ret Time	Area			Peak #	Ret Time	Area			Peak #	Ret Time	Area
														1	7.782	188943419	99.0292		1	7.687	172923817	99.0753		1	7.69	171702686	98.9907
														2	7.962	1852235	0.970795		2	7.867	1613892	0.924667		2	7.87	1750677	1.00931
																190795654					174537709					173453363
														TIC: org321.D\data.ms					TIC: org090.D\data.ms					TIC: org214.D\data.ms
														Kub DMSO 48 h					Kub DMSO 48 h					Kub DMSO 48 h
														Peak #	Ret Time	Area			Peak #	Ret Time	Area			Peak #	Ret Time	Area
														1	7.783	195469662	99.9776		1	7.688	180965813	99.9815		1	7.691	181875206	99.9772
														2	7.962	43846	0.0224261		2	7.867	33571	0.0185476		2	7.87	41442	0.0227808
																195513508					180999384					181916648

## Sheet: S4
DMSO sus														TIC: org250.D\data.ms					TIC: org019.D\data.ms					TIC: org142.D\data.ms
	1		2		3		av		STD		RSD			Kub DMSO sus 0h					Kub DMSO sus 0h					Kub DMSO sus 0h
Time/h	thymol	kubicin	thymol	kubicin	thymol	kubicin	thymol	kubicin	thymol	kubicin	thymol	kubicin
0	0.0529219	99.9471	0.050472	99.9495	0.0478864	99.9521	0.0504268	99.9496	0.00251804	0.00251804	4.99345	0.00251931		Peak #	Ret Time	Area			Peak #	Ret Time	Area			Peak #	Ret Time	Area
1	0.240009	99.76	0.228943	99.7711	0.250259	99.7497	0.239737	99.7603	0.0106604	0.0106604	4.44669	0.010686		1	7.825	116488	0.0529219		1	7.73	107845	0.050472		1	7.733	94350	0.0478864
2	0.455833	99.5442	0.477542	99.5225	0.458208	99.5418	0.463861	99.5361	0.0119072	0.0119072	2.56698	0.0119627		2	7.993	219996490	99.9471		2	7.898	213564952	99.9495		2	7.901	196934258	99.9521
3	0.993807	99.0062	1.07663	98.9234	0.959967	99.04	1.01013	98.9899	0.0600206	0.0600206	5.94184	0.0606331				220112978					213672797					197028608
4	1.12449	98.8755	1.13491	98.8651	1.11511	98.8849	1.12484	98.8752	0.00990713	0.00990713	0.880762	0.0100198
5	1.39626	98.6037	1.4212	98.5788	1.38325	98.6168	1.40024	98.5998	0.0192873	0.0192873	1.37743	0.0195612		TIC: org256.D\data.ms					TIC: org025.D\data.ms					TIC: org146.D\data.ms
6	1.61638	98.3836	1.62941	98.3706	1.59009	98.4099	1.61196	98.388	0.0200291	0.0200291	1.24253	0.0203572		Kub DMSO sus 1h					Kub DMSO sus 1h					Kub DMSO sus 1h
8	2.04957	97.9504	2.09652	97.9035	1.9693	98.0307	2.03846	97.9615	0.064335	0.064335	3.15605	0.0656737
10	2.80361	97.1964	2.84464	97.1554	2.74858	97.2514	2.79895	97.2011	0.048198	0.048198	1.72201	0.0495859		Peak #	Ret Time	Area			Peak #	Ret Time	Area			Peak #	Ret Time	Area
12	3.03031	96.9697	3.12818	96.8718	2.95996	97.04	3.03948	96.9605	0.0844881	0.0844881	2.77969	0.0871366		1	7.829	530573	0.240009		1	7.734	491204	0.228943		1	7.737	495287	0.250259
16	3.93481	96.0652	4.10572	95.8943	3.85292	96.1471	3.96448	96.0355	0.128984	0.128984	3.2535	0.134309		2	7.994	220533015	99.76		2	7.899	214061404	99.7711		2	7.902	197414539	99.7497
24	5.72871	94.2713	5.92259	94.0774	5.53424	94.4658	5.72851	94.2715	0.194174	0.194174	3.3896	0.205973				221063588					214552608					197909826
48	8.49025	91.5098	8.64559	91.3544	8.12656	91.8734	8.4208	91.5792	0.266392	0.266392	3.1635	0.290887
														TIC: org262.D\data.ms					TIC: org031.D\data.ms					TIC: org152.D\data.ms
														Kub DMSO sus 2h					Kub DMSO sus 2h					Kub DMSO sus 2h
														Peak #	Ret Time	Area			Peak #	Ret Time	Area			Peak #	Ret Time	Area
														1	7.806	1095797	0.455833		1	7.711	1014489	0.477542		1	7.714	921615	0.458208
														2	7.989	239298578	99.5442		2	7.894	211425367	99.5225		2	7.897	200212908	99.5418
																240394375					212439856					201134523
														TIC: org268.D\data.ms					TIC: org037.D\data.ms					TIC: org158.D\data.ms
														Kub DMSO sus 3h					Kub DMSO sus 3h					Kub DMSO sus 3h
														Peak #	Ret Time	Area			Peak #	Ret Time	Area			Peak #	Ret Time	Area
														1	7.847	2160370	0.993807		1	7.752	2200071	1.07663		1	7.755	1935259	0.959967
														2	8.003	215222948	99.0062		2	7.908	202147946	98.9234		2	7.911	199661126	99.04
																217383318					204348017					201596385
														TIC: org274.D\data.ms					TIC: org043.D\data.ms					TIC: org164.D\data.ms
														Kub DMSO sus 4h					Kub DMSO sus 4h					Kub DMSO sus 4h
														Peak #	Ret Time	Area			Peak #	Ret Time	Area			Peak #	Ret Time	Area
														1	7.819	2443761	1.12449		1	7.724	2282434	1.13491		1	7.727	2169121	1.11511
														2	7.997	214877863	98.8755		2	7.902	198828635	98.8651		2	7.905	192352217	98.8849
																217321624					201111069					194521338
														TIC: org280.D\data.ms					TIC: org049.D\data.ms					TIC: org170.D\data.ms
														Kub DMSO sus 5h					Kub DMSO sus 5h					Kub DMSO sus 5h
														Peak #	Ret Time	Area			Peak #	Ret Time	Area			Peak #	Ret Time	Area
														1	7.817	3071702	1.39626		1	7.722	2893782	1.4212		1	7.725	2681631	1.38325
														2	7.993	216923537	98.6037		2	7.898	200721518	98.5788		2	7.901	191183443	98.6168
																219995239					203615300					193865074
														TIC: org286.D\data.ms					TIC: org055.D\data.ms					TIC: org176.D\data.ms
														Kub DMSO sus 6h					Kub DMSO sus 6h					Kub DMSO sus 6h
														Peak #	Ret Time	Area			Peak #	Ret Time	Area			Peak #	Ret Time	Area
														1	7.815	3391482	1.61638		1	7.72	3279834	1.62941		1	7.723	3018090	1.59009
														2	7.991	206427822	98.3836		2	7.896	198009728	98.3706		2	7.899	186787993	98.4099
																209819304					201289562					189806083
														TIC: org292.D\data.ms					TIC: org061.D\data.ms					TIC: org182.D\data.ms
														Kub DMSO sus 8h					Kub DMSO sus 6h					Kub DMSO sus 6h
														Peak #	Ret Time	Area			Peak #	Ret Time	Area			Peak #	Ret Time	Area
														1	7.819	4391482	2.04957		1	7.724	4265634	2.09652		1	7.727	3733890	1.9693
														2	8.003	209872157	97.9504		2	7.908	199196806	97.9035		2	7.911	185871259	98.0307
																214263639					203462440					189605149
														TIC: org298.D\data.ms					TIC: org067.D\data.ms					TIC: org188.D\data.ms
														Kub DMSO sus 10h					Kub DMSO sus 10h					Kub DMSO sus 10h
														Peak #	Ret Time	Area			Peak #	Ret Time	Area			Peak #	Ret Time	Area
														1	7.866	6162640	2.80361		1	7.771	5905372	2.84464		1	7.774	5320493	2.74858
														2	8.012	213648338	97.1964		2	7.917	201690944	97.1554		2	7.92	188251583	97.2514
																219810978					207596316					193572076
														TIC: org304.D\data.ms					TIC: org073.D\data.ms					TIC: org194.D\data.ms
														Kub DMSO sus 12h					Kub DMSO sus 12h					Kub DMSO sus 12h
														Peak #	Ret Time	Area			Peak #	Ret Time	Area			Peak #	Ret Time	Area
														1	7.822	6690071	3.03031		1	7.727	6493668	3.12818		1	7.73	5692966	2.95996
														2	7.993	214082060	96.9697		2	7.898	201092271	96.8718		2	7.901	186639838	97.04
																220772131					207585939					192332804
														TIC: org310.D\data.ms					TIC: org079.D\data.ms					TIC: org200.D\data.ms
														Kub DMSO sus 16h					Kub DMSO sus 16h					Kub DMSO sus 16h
														Peak #	Ret Time	Area			Peak #	Ret Time	Area			Peak #	Ret Time	Area
														1	7.839	8011680	3.93481		1	7.744	8177213	4.10572		1	7.747	7176863	3.85292
														2	7.999	195598614	96.0652		2	7.904	190989354	95.8943		2	7.907	179094011	96.1471
																203610294					199166567					186270874
														TIC: org316.D\data.ms					TIC: org085.D\data.ms					TIC: org206.D\data.ms
														Kub DMSO sus 24H					Kub DMSO sus 24H					Kub DMSO sus 24H
														Peak #	Ret Time	Area			Peak #	Ret Time	Area			Peak #	Ret Time	Area
														1	7.845	12196035	5.72871		1	7.75	11691089	5.92259		1	7.753	10525208	5.53424
														2	8.004	200697264	94.2713		2	7.909	185707185	94.0774		2	7.912	179658170	94.4658
																212893299					197398274					190183378
														TIC: org322.D\data.ms					TIC: org091.D\data.ms					TIC: org212.D\data.ms
														Kub DMSO sus 48 h					Kub DMSO sus 48 h					Kub DMSO sus 48 h
														Peak #	Ret Time	Area			Peak #	Ret Time	Area			Peak #	Ret Time	Area
														1	7.817	17519820	8.49025		1	7.722	16819849	8.64559		1	7.725	15394255	8.12656
														2	7.989	188832418	91.5098		2	7.894	177728525	91.3544		2	7.897	174037116	91.8734
																206352238					194548374					189431371

## Sheet: S5
metanol														TIC: org251.D\data.ms					TIC: org020.D\data.ms					TIC: org143.D\data.ms
	1		2		3		av		STD		RSD			Kub metanol 0h					Kub metanol 0h					Kub metanol 0h
Time/h	thymol	kubicin	thymol	kubicin	thymol	kubicin	thymol	kubicin	thymol	kubicin	thymol	kubicin
0	0.208526	99.7915	0.151327	99.8487	0.219637	99.7804	0.193164	99.8068	0.036655	0.036655	18.9761	0.0367259		Peak #	Ret Time	Area			Peak #	Ret Time	Area			Peak #	Ret Time	Area
1	6.89723	93.1028	7.19998	92.8	6.67265	93.3274	6.92329	93.0767	0.264631	0.264631	3.82233	0.284315		1	7.789	471161	0.208526		1	7.694	316201	0.151327		1	7.697	518740	0.219637
2	11.9174	88.0826	12.0939	87.9061	11.8099	88.1901	11.9404	88.0596	0.143358	0.143358	1.20061	0.162797		2	7.996	225476747	99.7915		2	7.901	208635889	99.8487		2	7.904	235661532	99.7804
3	16.5953	83.4047	16.7308	83.2692	16.3112	83.6888	16.5458	83.4542	0.214109	0.214109	1.29404	0.256558				225947908					208952090					236180272
4	19.537	80.463	19.6675	80.3325	19.38	80.62	19.5282	80.4718	0.143937	0.143937	0.737074	0.178867
5	22.5434	77.4566	22.7078	77.2922	22.416	77.584	22.5557	77.4443	0.146338	0.146338	0.648784	0.188959		TIC: org257.D\data.ms					TIC: org026.D\data.ms					TIC: org149.D\data.ms
6	24.641	75.359	24.773	75.227	24.2732	75.7268	24.5624	75.4376	0.259013	0.259013	1.05451	0.343347		Kub metanol 1h					Kub metanol 1h					Kub metanol 1h
8	28.9718	71.0282	29.1642	70.8358	28.595	71.405	28.9103	71.0897	0.289569	0.289569	1.00161	0.407329
10	33.6452	66.3548	33.8347	66.1653	32.9684	67.0316	33.4828	66.5172	0.455423	0.455423	1.36017	0.68467		Peak #	Ret Time	Area			Peak #	Ret Time	Area			Peak #	Ret Time	Area
12	39.2022	60.7978	40.0222	59.9778	38.7146	61.2854	39.313	60.687	0.660767	0.660767	1.68079	1.08881		1	7.793	16174682	6.89723		1	7.698	15674521	7.19998		1	7.701	16315482	6.67265
16	46.1107	53.8893	46.4291	53.5709	45.7127	54.2873	46.0842	53.9158	0.358913	0.358913	0.778821	0.665691		2	7.996	218335162	93.1028		2	7.901	202027709	92.8		2	7.904	228197361	93.3274
24	60.3226	39.6774	60.5742	39.4258	60.0984	39.9016	60.3318	39.6682	0.238001	0.238001	0.394487	0.599979				234509844					217702230					244512843
48	83.0768	16.9232	83.2028	16.7972	82.9072	17.0928	83.0623	16.9377	0.148375	0.148375	0.178631	0.876002
														TIC: org263.D\data.ms					TIC: org032.D\data.ms					TIC: org155.D\data.ms
														Kub metanol 2h					Kub metanol 2h					Kub metanol 2h
														Peak #	Ret Time	Area			Peak #	Ret Time	Area			Peak #	Ret Time	Area
														1	7.796	26500541	11.9174		1	7.701	24934201	12.0939		1	7.704	27414266	11.8099
														2	7.994	195867366	88.0826		2	7.899	181238032	87.9061		2	7.902	204714695	88.1901
																222367907					206172233					232128961
														TIC: org269.D\data.ms					TIC: org038.D\data.ms					TIC: org161.D\data.ms
														Kub metanol 3h					Kub metanol 3h					Kub metanol 3h
														Peak #	Ret Time	Area			Peak #	Ret Time	Area			Peak #	Ret Time	Area
														1	7.798	34961698	16.5953		1	7.703	32667540	16.7308		1	7.706	36962944	16.3112
														2	7.992	175710508	83.4047		2	7.897	162586690	83.2692		2	7.9	189647352	83.6888
																210672206					195254230					226610296
														TIC: org275.D\data.ms					TIC: org044.D\data.ms					TIC: org167.D\data.ms
														Kub metanol 4h					Kub metanol 4h					Kub metanol 4h
														Peak #	Ret Time	Area			Peak #	Ret Time	Area			Peak #	Ret Time	Area
														1	7.801	41644130	19.537		1	7.706	38854136	19.6675		1	7.709	43091431	19.38
														2	7.992	171511005	80.463		2	7.897	158700848	80.3325		2	7.9	179258157	80.62
																213155135					197554984					222349588
														TIC: org281.D\data.ms					TIC: org050.D\data.ms					TIC: org173.D\data.ms
														Kub metanol 5h					Kub metanol 5h					Kub metanol 5h
														Peak #	Ret Time	Area			Peak #	Ret Time	Area			Peak #	Ret Time	Area
														1	7.796	48518302	22.5434		1	7.701	45318244	22.7078		1	7.704	50340440	22.416
														2	7.994	166703696	77.4566		2	7.899	154252597	77.2922		2	7.902	174233702	77.584
																215221998					199570841					224574142
														TIC: org287.D\data.ms					TIC: org056.D\data.ms					TIC: org179.D\data.ms
														Kub metanol 6h					Kub metanol 6h					Kub metanol 6h
														Peak #	Ret Time	Area			Peak #	Ret Time	Area			Peak #	Ret Time	Area
														1	7.802	49164823	24.641		1	7.707	45816793	24.773		1	7.71	52616572	24.2732
														2	7.99	150359946	75.359		2	7.895	139129562	75.227		2	7.898	164151705	75.7268
																199524769					184946355					216768277
														TIC: org293.D\data.ms					TIC: org062.D\data.ms					TIC: org185.D\data.ms
														Kub metanol 8h					Kub metanol 8h					Kub metanol 8h
														Peak #	Ret Time	Area			Peak #	Ret Time	Area			Peak #	Ret Time	Area
														1	7.804	61080297	28.9718		1	7.709	57048139	29.1642		1	7.712	63877775	28.595
														2	7.991	149746362	71.0282		2	7.896	138561806	70.8358		2	7.899	159510405	71.405
																210826659					195609945					223388180
														TIC: org299.D\data.ms					TIC: org068.D\data.ms					TIC: org191.D\data.ms
														Kub metanol 10h					Kub metanol 10h					Kub metanol 10h
														Peak #	Ret Time	Area			Peak #	Ret Time	Area			Peak #	Ret Time	Area
														1	7.805	61548722	33.6452		1	7.71	59481807	33.8347		1	7.713	70267653	32.9684
														2	7.988	121385697	66.3548		2	7.893	116319399	66.1653		2	7.896	142868689	67.0316
																182934419					175801206					213136342
														TIC: org305.D\data.ms					TIC: org074.D\data.ms					TIC: org197.D\data.ms
														Kub metanol 12h					Kub metanol 12h					Kub metanol 12h
														Peak #	Ret Time	Area			Peak #	Ret Time	Area			Peak #	Ret Time	Area
														1	7.81	69232909	39.2022		1	7.715	66295827	40.0222		1	7.718	79103776	38.7146
														2	7.988	107371551	60.7978		2	7.893	99351970	59.9778		2	7.896	125221524	61.2854
																176604460					165647797					204325300
														TIC: org311.D\data.ms					TIC: org080.D\data.ms					TIC: org203.D\data.ms
														Kub metanol 16H					Kub metanol 16H					Kub metanol 16H
														Peak #	Ret Time	Area			Peak #	Ret Time	Area			Peak #	Ret Time	Area
														1	7.812	78700125	46.1107		1	7.717	73760576	46.4291		1	7.72	89704591	45.7127
														2	7.984	91976392	53.8893		2	7.889	85106675	53.5709		2	7.892	106530966	54.2873
																170676517					158867251					196235557
														TIC: org317.D\data.ms					TIC: org086.D\data.ms					TIC: org209.D\data.ms
														Kub metanol 24 h					Kub metanol 24 h					Kub metanol 24 h
														Peak #	Ret Time	Area			Peak #	Ret Time	Area			Peak #	Ret Time	Area
														1	7.818	107558330	60.3226		1	7.723	100577502	60.5742		1	7.726	114984502	60.0984
														2	7.979	70746788	39.6774		2	7.884	65462710	39.4258		2	7.887	76342420	39.9016
																178305118					166040212					191326922
														TIC: org323.D\data.ms					TIC: org092.D\data.ms					TIC: org215.D\data.ms
														Kub metanol 48 h					Kub metanol 48 h					Kub metanol 48 h
														Peak #	Ret Time	Area			Peak #	Ret Time	Area			Peak #	Ret Time	Area
														1	7.822	152500528	83.0768		1	7.727	142384989	83.2028		1	7.73	157485052	82.9072
														2	7.974	31065220	16.9232		2	7.879	28744959	16.7972		2	7.882	32468436	17.0928
																183565748					171129948					189953488

## Sheet: S6
metanol dry																TIC: org252.D\data.ms					TIC: org021.D\data.ms					TIC: org144.D\data.ms
	1		2		3		av		STD		RSD					Kub metanol sus 0h					Kub metanol sus 0h					Kub metanol sus 0h
Time/h	thymol	kubicin	thymol	kubicin	thymol	kubicin	thymol	kubicin	thymol	kubicin	thymol	kubicin
0	0.15463	99.8454	0.154975	99.845	0.158318	99.8417	0.155974	99.844	0.00203686	0.00203686	1.3059	0.00204004				Peak #	Ret Time	Area			Peak #	Ret Time	Area			Peak #	Ret Time	Area
1	15.392	84.608	15.3831	84.6169	15.4006	84.5994	15.3919	84.6081	0.00877126	0.00877126	0.0569862	0.0103669				1	7.793	258330	0.15463		1	7.698	239162	0.154975		1	7.701	244329	0.158318
2	46.0266	53.9734	45.4479	54.5521	46.3138	53.6862	45.9294	54.0706	0.441026	0.441026	0.960225	0.815649				2	7.991	166805118	99.8454		2	7.896	154084092	99.845		2	7.899	154084092	99.8417
3	66.7778	33.2222	65.3359	34.6641	67.6948	32.3052	66.6028	33.3972	1.18912	1.18912	1.78539	3.56054						167063448					154323254					154328421
4	79.0264	20.9736	77.8072	22.1928	80.0974	19.9026	78.977	21.023	1.14592	1.14592	1.45095	5.45078
5	88.9102	11.0898	87.9472	12.0528	89.7151	10.2849	88.8575	11.1425	0.885109	0.885109	0.996099	7.94353				TIC: org258.D\data.ms					TIC: org027.D\data.ms					TIC: org150.D\data.ms
6	93.0231	6.97695	92.5255	7.47455	93.4502	6.54984	92.9996	7.00045	0.462801	0.462801	0.497638	6.61102				Kub metanol sus 1h					Kub metanol sus 1h					Kub metanol sus 1h
8	98.4075	1.59251	98.2839	1.71614	98.5125	1.48755	98.4013	1.59873	0.114421	0.114421	0.11628	7.157
10	99.4744	0.525645	99.4376	0.562378	99.506	0.494036	99.4726	0.527353	0.0342028	0.0342028	0.0343841	6.48574				Peak #	Ret Time	Area			Peak #	Ret Time	Area			Peak #	Ret Time	Area
12	99.8829	0.117082	99.8704	0.129606	99.893	0.106957	99.8821	0.117882	0.0113456	0.0113456	0.0113589	9.62454				1	7.809	27790460	15.392		1	7.714	25710900	15.3831		1	7.717	26284217	15.4006
16	99.9398	0.0602085	99.9334	0.0666142	99.9474	0.0526047	99.9402	0.0598091	0.00701325	0.00701325	0.00701744	11.726				2	8.015	152761213	84.608		2	7.92	141426331	84.6169		2	7.923	144385316	84.5994
24	99.967	0.0330184	99.9645	0.0355286	99.9691	0.0308814	99.9669	0.0331428	0.00232609	0.00232609	0.00232687	7.0184						180551673					167137231					170669533
48	99.9917	0.00834755	99.9916	0.00835309	99.992	0.00802758	99.9918	0.00824274	0.000186353	0.000186353	0.000186369	2.26082
																TIC: org264.D\data.ms					TIC: org033.D\data.ms					TIC: org156.D\data.ms
																Kub metanol sus 2h					Kub metanol sus 2h					Kub metanol sus 2h
																Peak #	Ret Time	Area			Peak #	Ret Time	Area			Peak #	Ret Time	Area
																1	7.817	96583409	46.0266		1	7.722	87356073	45.4479		1	7.725	92348588	46.3138
																2	7.989	113259059	53.9734		2	7.894	104855237	54.5521		2	7.897	107049065	53.6862
																		209842468					192211310					199397653
																TIC: org270.D\data.ms					TIC: org039.D\data.ms					TIC: org162.D\data.ms
																Kub metanol sus 3h					Kub metanol sus 3h					Kub metanol sus 3h
																Peak #	Ret Time	Area			Peak #	Ret Time	Area			Peak #	Ret Time	Area
																1	7.818	101153123	66.7778		1	7.723	91583835	65.3359		1	7.726	99670624	67.6948
																2	7.979	50323966	33.2222		2	7.884	48589928	34.6641		2	7.887	47564703	32.3052
																		151477089					140173763					147235327
																TIC: org276.D\data.ms					TIC: org045.D\data.ms					TIC: org168.D\data.ms
																Kub metanol sus 4h					Kub metanol sus 4h					Kub metanol sus 4h
																Peak #	Ret Time	Area			Peak #	Ret Time	Area			Peak #	Ret Time	Area
																1	7.819	156911005	79.0264		1	7.724	135169354	77.8072		1	7.727	158406429	80.0974
																2	7.981	41644130	20.9736		2	7.886	38554136	22.1928		2	7.889	39360782	19.9026
																		198555135					173723490					197767211
																TIC: org282.D\data.ms					TIC: org051.D\data.ms					TIC: org174.D\data.ms
																Kub metanol sus 5h					Kub metanol sus 5h					Kub metanol sus 5h
																Peak #	Ret Time	Area			Peak #	Ret Time	Area			Peak #	Ret Time	Area
																1	7.822	121117973	88.9102		1	7.727	102054715	87.9472		1	7.73	124553379	89.7151
																2	7.972	15107122	11.0898		2	7.877	13986174	12.0528		2	7.88	14278799	10.2849
																		136225095					116040889					138832178
																TIC: org288.D\data.ms					TIC: org057.D\data.ms					TIC: org180.D\data.ms
																Kub metanol sus 6h					Kub metanol sus 6h					Kub metanol sus 6h
																Peak #	Ret Time	Area			Peak #	Ret Time	Area			Peak #	Ret Time	Area
																1	7.819	152379212	93.0231		1	7.724	130976676	92.5255		1	7.727	154120259	93.4502
																2	7.981	11428798	6.97695		2	7.886	10580781	7.47455		2	7.889	10802157	6.54984
																		163808010					141557457					164922416
																TIC: org294.D\data.ms					TIC: org063.D\data.ms					TIC: org186.D\data.ms
																Kub metanol sus 8h					Kub metanol sus 8h					Kub metanol sus 8h
																Peak #	Ret Time	Area			Peak #	Ret Time	Area			Peak #	Ret Time	Area
																1	7.821	148939262	98.4075		1	7.726	127794137	98.2839		1	7.729	150866754	98.5125
																2	7.97	2410256	1.59251		2	7.875	2231415	1.71614		2	7.878	2278102	1.48755
																		151349518					130025552					153144856
																TIC: org300.D\data.ms					TIC: org069.D\data.ms					TIC: org192.D\data.ms
																Kub metanol sus 10h					Kub metanol sus 10h					Kub metanol sus 10h
																Peak #	Ret Time	Area			Peak #	Ret Time	Area			Peak #	Ret Time	Area
																1	7.822	1.66222e+08	99.4744		1	7.727	143783706	99.4376		1	7.73	167212868	99.506
																2	7.968	878354	0.525645		2	7.873	813181	0.562378		2	7.876	830194	0.494036
																		1.671e+08					144596887					168043062
																TIC: org306.D\data.ms					TIC: org075.D\data.ms					TIC: org198.D\data.ms
																Kub metanol sus 12h					Kub metanol sus 12h					Kub metanol sus 12h
																Peak #	Ret Time	Area			Peak #	Ret Time	Area			Peak #	Ret Time	Area
																1	7.823	1.57408e+08	99.8829		1	7.728	131629371	99.8704		1	7.731	162876703	99.893
																2	7.968	184512	0.117082		2	7.873	170821	0.129606		2	7.876	174395	0.106957
																		1.57593e+08					131800192					163051098
																TIC: org312.D\data.ms					TIC: org081.D\data.ms					TIC: org204.D\data.ms
																Kub metanol sus 16H					Kub metanol sus 16H					Kub metanol sus 16H
																Peak #	Ret Time	Area			Peak #	Ret Time	Area			Peak #	Ret Time	Area
																1	7.82	1.4698e+08	99.9398		1	7.725	122981936	99.9334		1	7.728	159014143	99.9474
																2	7.968	88548	0.0602085		2	7.873	81978	0.0666142		2	7.876	83693	0.0526047
																		1.47069e+08					123063914					159097836
																TIC: org318.D\data.ms					TIC: org087.D\data.ms					TIC: org210.D\data.ms
																Kub metanol sus 24 h					Kub metanol sus 24 h					Kub metanol sus 24 h
																Peak #	Ret Time	Area			Peak #	Ret Time	Area			Peak #	Ret Time	Area
																1	7.822	1.5433e+08	99.967		1	7.727	132781033	99.9645		1	7.73	155964850	99.9691
																2	7.968	50974	0.0330184		2	7.873	47192	0.0355286		2	7.876	48179	0.0308814
																		1.5438e+08					132828225					156013029
																TIC: org324.D\data.ms					TIC: org093.D\data.ms					TIC: org216.D\data.ms
																Kub metanol sus 48 h					Kub metanol sus 48 h					Kub metanol sus 48 h
																Peak #	Ret Time	Area			Peak #	Ret Time	Area			Peak #	Ret Time	Area
																1	7.817	1.62046e+08	99.9917		1	7.722	149920084	99.9916		1	7.725	159263093	99.992
																2	7.977	13528	0.00834755		2	7.882	12524	0.00835309		2	7.885	12786	0.00802758
																		1.6206e+08					149932608					159275879

## Sheet: S7
acetone												TIC: org330.D\data.ms					TIC: org100.D\data.ms
	1		2		av		STD		RSD			Kub aceton 0h					Kub aceton 0h
Time/h	thymol	kubicin	thymol	kubicin	thymol	kubicin	thymol	kubicin	thymol	kubicin
0	0.0118301	99.9882	0.0116964	99.9883	0.0117633	99.9882	9.4534e-05	9.4534e-05	0.803637	9.45451e-05		Peak #	Ret Time	Area			Peak #	Ret Time	Area
1	0.0116871	99.9883	0.0118395	99.9882	0.0117633	99.9882	0.000107776	0.000107776	0.916202	0.000107789		1	7.789	30765	0.0118301		1	7.694	26167	0.0116964
2	0.01201	99.988	0.0113858	99.9886	0.0116979	99.9883	0.000441361	0.000441361	3.77299	0.000441413		2	8.001	260025703	99.9882		2	7.905	223691636	99.9883
3	0.0129707	99.987	0.0120196	99.988	0.0124951	99.9875	0.000672528	0.000672528	5.38232	0.000672612				260056468					223717803
4	0.0113767	99.9886	0.0129813	99.987	0.012179	99.9878	0.00113461	0.00113461	9.31615	0.00113475
5	0.00979267	99.9902	0.0105347	99.9895	0.0101637	99.9898	0.000524668	0.000524668	5.16219	0.000524721		TIC: org333.D\data.ms					TIC: org103.D\data.ms
6	0.0105264	99.9895	0.00980009	99.9902	0.0101632	99.9898	0.000513558	0.000513558	5.0531	0.00051361		Kub aceton 1h					Kub aceton 1h
8	0.0112277	99.9888	0.0112367	99.9888	0.0112322	99.9888	6.37997e-06	6.37997e-06	0.0568007	6.38068e-06
10	0.012423	99.9876	0.0111398	99.9889	0.0117814	99.9882	0.000907322	0.000907322	7.70132	0.000907429		Peak #	Ret Time	Area			Peak #	Ret Time	Area
12	0.0111311	99.9889	0.0124329	99.9876	0.011782	99.9882	0.000920532	0.000920532	7.81302	0.00092064		1	7.789	27962	0.0116871		1	7.694	28790	0.0118395
16	0.0113988	99.9886	0.0109293	99.9891	0.0111641	99.9888	0.000332023	0.000332023	2.97404	0.00033206		2	8	239226863	99.9883		2	7.906	243139466	99.9882
24	0.010921	99.9891	0.0111634	99.9888	0.0110422	99.989	0.000171441	0.000171441	1.5526	0.00017146				239254825					243168256
48	0.0111548	99.9888	0.0114078	99.9886	0.0112813	99.9887	0.000178917	0.000178917	1.58596	0.000178937
												TIC: org336.D\data.ms					TIC: org106.D\data.ms
												Kub aceton 2h					Kub aceton 2h
												Peak #	Ret Time	Area			Peak #	Ret Time	Area
												1	7.79	32136	0.01201		1	7.695	25238	0.0113858
												2	8.005	267544704	99.988		2	7.906	221636263	99.9886
														267576840					221661501
												TIC: org339.D\data.ms					TIC: org109.D\data.ms
												Kub aceton 3h					Kub aceton 3h
												Peak #	Ret Time	Area			Peak #	Ret Time	Area
												1	7.789	32124	0.0129707		1	7.695	30073	0.0120196
												2	8.002	247633919	99.987		2	7.91	250169728	99.988
														247666043					250199801
												TIC: org342.D\data.ms					TIC: org112.D\data.ms
												Kub aceton 4h					Kub aceton 4h
												Peak #	Ret Time	Area			Peak #	Ret Time	Area
												1	7.79	26969	0.0113767		1	7.694	30062	0.0129813
												2	8.001	237028009	99.9886		2	7.907	231549771	99.987
														237054978					231579833
												TIC: org345.D\data.ms					TIC: org115.D\data.ms
												Kub aceton 5h					Kub aceton 5h
												Peak #	Ret Time	Area			Peak #	Ret Time	Area
												1	7.789	20136	0.00979267		1	7.696	23617	0.0105347
												2	7.997	205602969	99.9902		2	7.906	224160035	99.9895
														205623105					224183652
												TIC: org348.D\data.ms					TIC: org118.D\data.ms
												Kub aceton 6h					Kub aceton 6h
												Peak #	Ret Time	Area			Peak #	Ret Time	Area
												1	7.791	25237	0.0105264		1	7.694	18843	0.00980009
												2	8.001	239725008	99.9895		2	7.902	192254898	99.9902
														239750245					192273741
												TIC: org351.D\data.ms					TIC: org121.D\data.ms
												Kub aceton 8h					Kub aceton 8h
												Peak #	Ret Time	Area			Peak #	Ret Time	Area
												1	7.789	23760	0.0112277		1	7.694	22235	0.0112367
												2	7.999	211596010	99.9888		2	7.904	197856021	99.9888
														211619770					197878256
												TIC: org354.D\data.ms					TIC: org124.D\data.ms
												Kub aceton 10h					Kub aceton 10h
												Peak #	Ret Time	Area			Peak #	Ret Time	Area
												1	7.79	29239	0.012423		1	7.695	22359	0.0111398
												2	8.004	235333250	99.9876		2	7.906	200690082	99.9889
														235362489					200712441
												TIC: org357.D\data.ms					TIC: org127.D\data.ms
												Kub aceton 12h					Kub aceton 12h
												Peak #	Ret Time	Area			Peak #	Ret Time	Area
												1	7.79	23893	0.0111311		1	7.695	27362	0.0124329
												2	8.001	214626673	99.9889		2	7.909	220049252	99.9876
														214650566					220076614
												TIC: org360.D\data.ms					TIC: org130.D\data.ms
												Kub aceton 16h					Kub aceton 16h
												Peak #	Ret Time	Area			Peak #	Ret Time	Area
												1	7.789	26386	0.0113988		1	7.694	21595	0.0109293
												2	8.005	231453345	99.9886		2	7.906	197566784	99.9891
														231479731					197588379
												TIC: org363.D\data.ms					TIC: org133.D\data.ms
												Kub aceton 24h					Kub aceton 24h
												Peak #	Ret Time	Area			Peak #	Ret Time	Area
												1	7.789	23077	0.010921		1	7.694	22575	0.0111634
												2	8.001	211286039	99.9891		2	7.91	202200364	99.9888
														211309116					202222939
												TIC: org366.D\data.ms					TIC: org136.D\data.ms
												Kub aceton 48h					Kub aceton 48h
												Peak #	Ret Time	Area			Peak #	Ret Time	Area
												1	7.789	24124	0.0111548		1	7.694	24692	0.0114078
												2	8.005	216241886	99.9888		2	7.91	216423549	99.9886
														216266010					216448241

## Sheet: S8
ACN												TIC: org331.D\data.ms					TIC: org101.D\data.ms
	1		2		av		STD		RSD			Kub acn 0h					Kub acn 0h
Time/h	thymol	kubicin	thymol	kubicin	thymol	kubicin	thymol	kubicin	thymol	kubicin
0	0.00957946	99.9904	0.00958682	99.9904	0.00958314	99.9904	5.20698e-06	5.20698e-06	0.0543348	5.20748e-06		Peak #	Ret Time	Area			Peak #	Ret Time	Area
1	0.0102692	99.9897	0.0120047	99.988	0.011137	99.9889	0.00122723	0.00122723	11.0195	0.00122737		1	7.791	30171	0.00957946		1	7.791	28234	0.00958682
2	0.0119952	99.988	0.0102773	99.9897	0.0111362	99.9889	0.00121473	0.00121473	10.9079	0.00121486		2	8.009	314925020	99.9904		2	8.009	294480216	99.9904
3	0.013858	99.9861	0.0118634	99.9881	0.0128607	99.9871	0.00141037	0.00141037	10.9665	0.00141055				314955191					294508450	100
4	0.0118541	99.9881	0.0138694	99.9861	0.0128617	99.9871	0.001425	0.001425	11.0794	0.00142518
5	0.0118247	99.9882	0.0118341	99.9882	0.0118294	99.9882	6.63324e-06	6.63324e-06	0.0560741	6.63403e-06		TIC: org334.D\data.ms					TIC: org104.D\data.ms
6	0.0118108	99.9882	0.01182	99.9882	0.0118154	99.9882	6.50158e-06	6.50158e-06	0.0550263	6.50235e-06		Kub acn 1h					Kub acn 1h
8	0.0112277	99.9888	0.0112367	99.9888	0.0112322	99.9888	6.37997e-06	6.37997e-06	0.0568007	6.38068e-06
10	0.0116839	99.9883	0.0116933	99.9883	0.0116886	99.9883	6.64186e-06	6.64186e-06	0.0568235	6.64264e-06		Peak #	Ret Time	Area			Peak #	Ret Time	Area
12	0.0119146	99.9881	0.0119242	99.9881	0.0119194	99.9881	6.81441e-06	6.81441e-06	0.0571708	6.81522e-06		1	7.791	31954	0.0102692		1	7.697	33746	0.0120047
16	0.0123715	99.9876	0.0123814	99.9876	0.0123765	99.9876	6.99574e-06	6.99574e-06	0.0565246	6.9966e-06		2	8.009	311132486	99.9897		2	7.914	281071884	99.988
24	0.0126524	99.9873	0.0126627	99.9873	0.0126575	99.9873	7.2492e-06	7.2492e-06	0.0572718	7.25012e-06				311164440					281105630
48	0.0124698	99.9875	0.0124796	99.9875	0.0124747	99.9875	6.93728e-06	6.93728e-06	0.0556108	6.93815e-06
												TIC: org337.D\data.ms					TIC: org107.D\data.ms
												Kub acn 2h					Kub acn 2h
												Peak #	Ret Time	Area			Peak #	Ret Time	Area
												1	7.792	36061	0.0119952		1	7.696	29903	0.0102773
												2	8.009	300593055	99.988		2	7.914	290931885	99.9897
														300629116					290961788
												TIC: org340.D\data.ms					TIC: org110.D\data.ms
												Kub acn 3h					Kub acn 3h
												Peak #	Ret Time	Area			Peak #	Ret Time	Area
												1	7.792	40254	0.013858		1	7.695	31132	0.0118634
												2	8.007	290434924	99.9861		2	7.912	262389065	99.9881
														290475178					262420197
												TIC: org343.D\data.ms					TIC: org113.D\data.ms
												Kub acn 4h					Kub acn 4h
												Peak #	Ret Time	Area			Peak #	Ret Time	Area
												1	7.79	33268	0.0118541		1	7.697	37670	0.0138694
												2	8.007	280612270	99.9881		2	7.912	271568384	99.9861
														280645538					271606054
												TIC: org346.D\data.ms					TIC: org116.D\data.ms
												Kub acn 5h					Kub acn 5h
												Peak #	Ret Time	Area			Peak #	Ret Time	Area
												1	7.791	33739	0.0118247		1	7.696	31573	0.0118341
												2	8.009	285292082	99.9882		2	7.914	266765045	99.9882
														285325821					266796618
												TIC: org349.D\data.ms					TIC: org119.D\data.ms
												Kub acn 6h					Kub acn 6h
												Peak #	Ret Time	Area			Peak #	Ret Time	Area
												1	7.791	30804	0.0118108		1	7.696	28826	0.01182
												2	8.006	260781034	99.9882		2	7.911	243845793	99.9882
														260811838					243874619
												TIC: org352.D\data.ms					TIC: org122.D\data.ms
												Kub acn 8h					Kub acn 8h
												Peak #	Ret Time	Area			Peak #	Ret Time	Area
												1	7.789	23760	0.0112277		1	7.694	22235	0.0112367
												2	7.999	211596010	99.9888		2	7.904	197856021	99.9888
														211619770					197878256
												TIC: org355.D\data.ms					TIC: org125.D\data.ms
												Kub acn 10h					Kub acn 10h
												Peak #	Ret Time	Area			Peak #	Ret Time	Area
												1	7.79	29445	0.0116839		1	7.695	27555	0.0116933
												2	8.005	251984428	99.9883		2	7.91	235620741	99.9883
														252013873					235648296
												TIC: org358.D\data.ms					TIC: org128.D\data.ms
												Kub acn 12h					Kub acn 12h
												Peak #	Ret Time	Area			Peak #	Ret Time	Area
												1	7.791	29228	0.0119146		1	7.696	27352	0.0119242
												2	8.006	245283862	99.9881		2	7.911	229354776	99.9881
														245313090					229382128
												TIC: org361.D\data.ms					TIC: org131.D\data.ms
												Kub acn 16h					Kub acn 16h
												Peak #	Ret Time	Area			Peak #	Ret Time	Area
												1	7.79	30406	0.0123715		1	7.695	28454	0.0123814
												2	8.006	245743964	99.9876		2	7.911	229783948	99.9876
														245774370					229812402
												TIC: org364.D\data.ms					TIC: org134.D\data.ms
												Kub acn 24h					Kub acn 24h
												Peak #	Ret Time	Area			Peak #	Ret Time	Area
												1	7.791	31313	0.0126524		1	7.696	29303	0.0126627
												2	8.007	247455071	99.9873		2	7.912	231383276	99.9873
														247486384					231412579
												TIC: org367.D\data.ms					TIC: org137.D\data.ms
												Kub acn 48h					Kub acn 48h
												Peak #	Ret Time	Area			Peak #	Ret Time	Area
												1	7.79	30540	0.0124698		1	7.695	28579	0.0124796
												2	8.009	244881114	99.9875		2	7.914	228976911	99.9875
														244911654					229005490
